# Supplementary material
Source: Springer Nature journal article supplement (https://www.springermedizin.de/resource/supplementary/12936_2010_1273_MOESM7_ESM.pdf/9549380)
Supplement: MOESM7 [file 9549380]

**a) Dry season versus raining season ( all ages)**

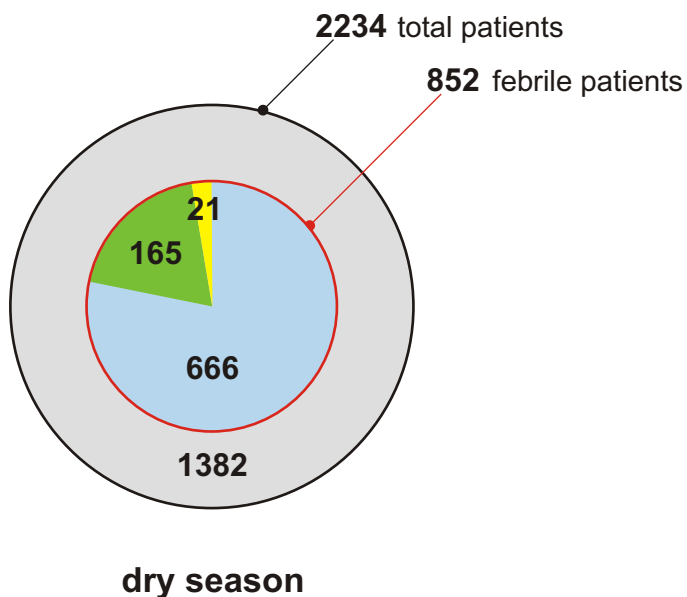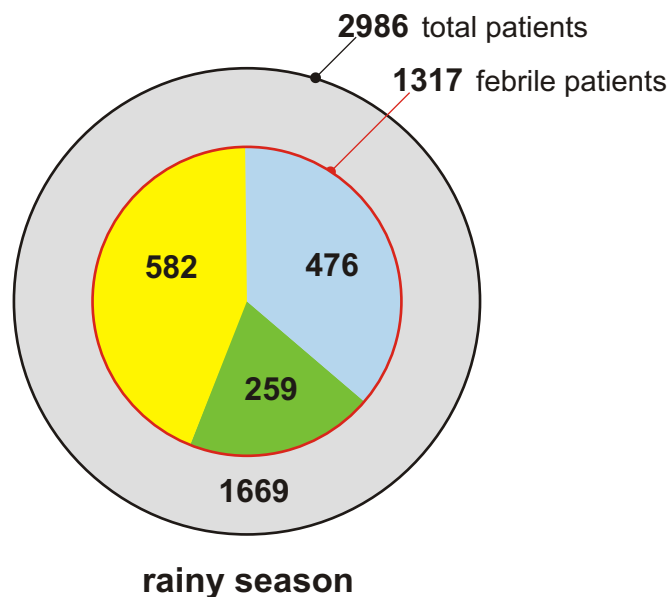

**b) Rainy season: patients under 5 versus ≥ 5 years old**

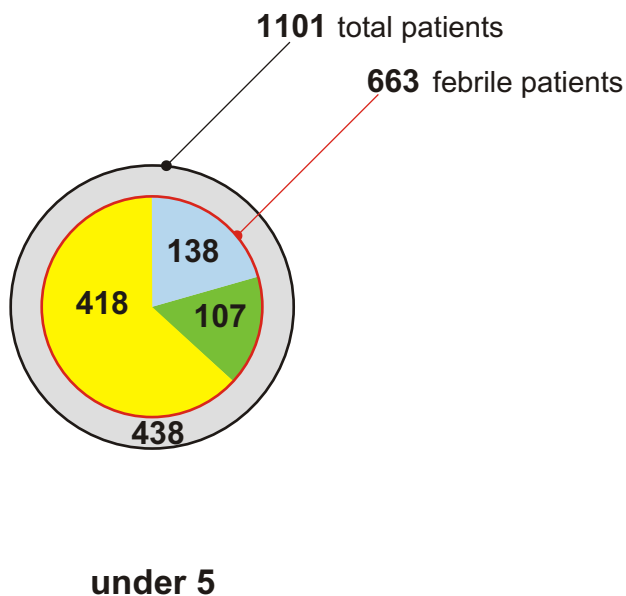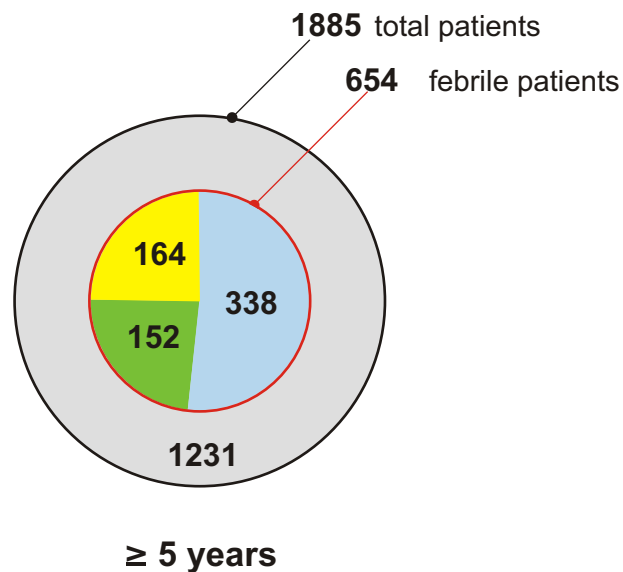

- non febrile patients (primary data)
- febrile not infected (primary data)
- malaria attributable fevers (estimated)
- febrile infected, not attributable (estimated)

(NB: areas are proportional to the respective populations)
